# Supplementary material for: Assessing the Diversity and Specificity of Two Freshwater Viral Communities through Metagenomics
Source: PubMed Central journal article supplement (PMC3303852; doi:10.1371/journal.pone.0033641), 2012-03-14
Supplement: pone.0033641.s001.pdf [file pone.0033641.s001.pdf]

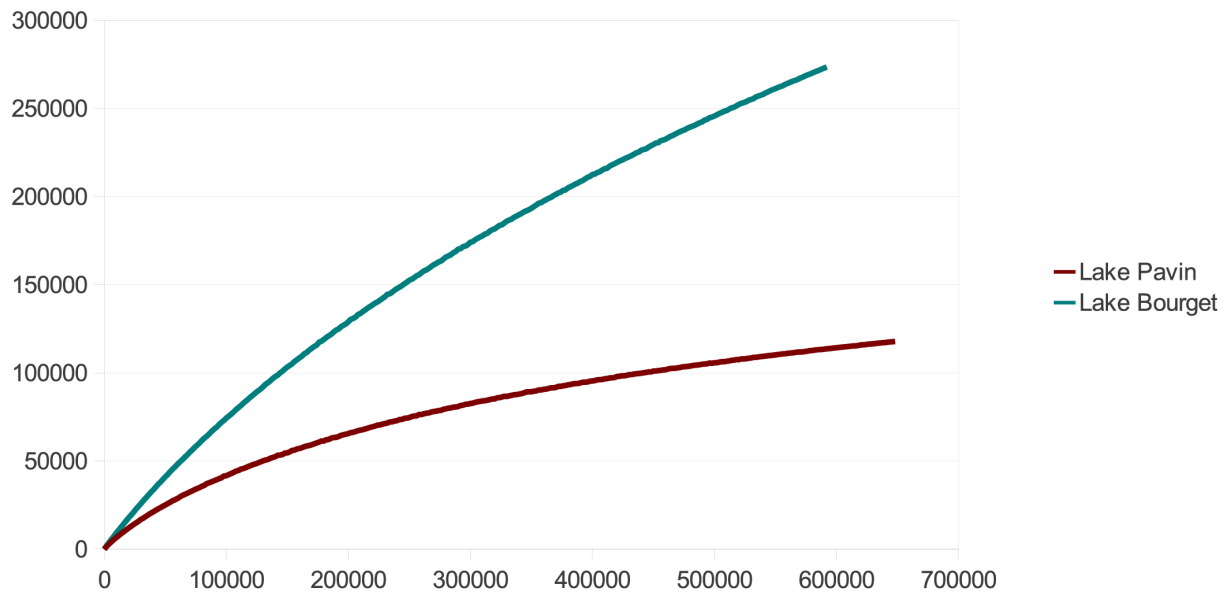

**Figure S1. Rarefaction curves based on whole viromes.** Each virome was clustered at 75% identity, and the curve presents the number of different clusters as a function of the number of input sequences.
